# Supplementary material
Source: PubMed Central journal article supplement (PMC4372513)
Supplement: NIHMS622443-supplement-supplement_1.pdf [file NIHMS622443-supplement-supplement_1.pdf]

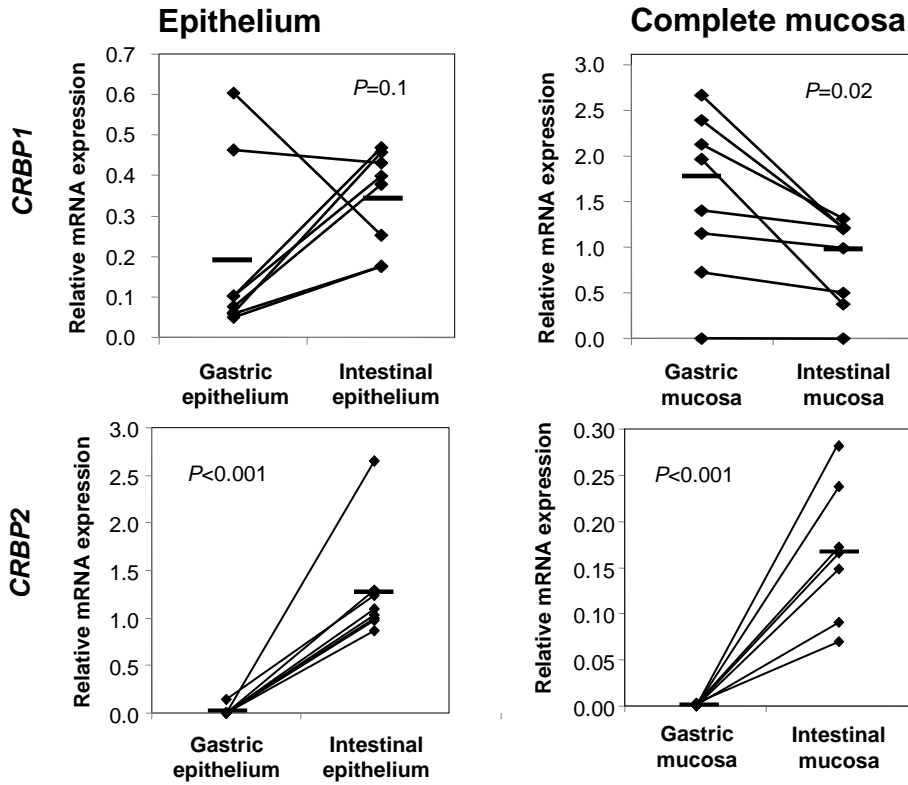

**Supplemental Figure 1: High concentrations of ROL in gastric mucosa are not due to sequestration by epithelial CRBPs.** RNA was isolated from dissected human gastric and intestinal mucosa or isolated gastric and intestinal epithelial cells, and gene expression of *CRBP1* and *CRBP2* was analyzed by quantitative RT-PCR using the random standard curve method. Data are shown as the geometric mean of results normalized to *18s rRNA* and *GAPDH* expression. Diamonds: individual samples, bars: mean, lines connect paired samples. Statistical significance was determined using the Student's *t*-test.

## Supplemental Figure 2

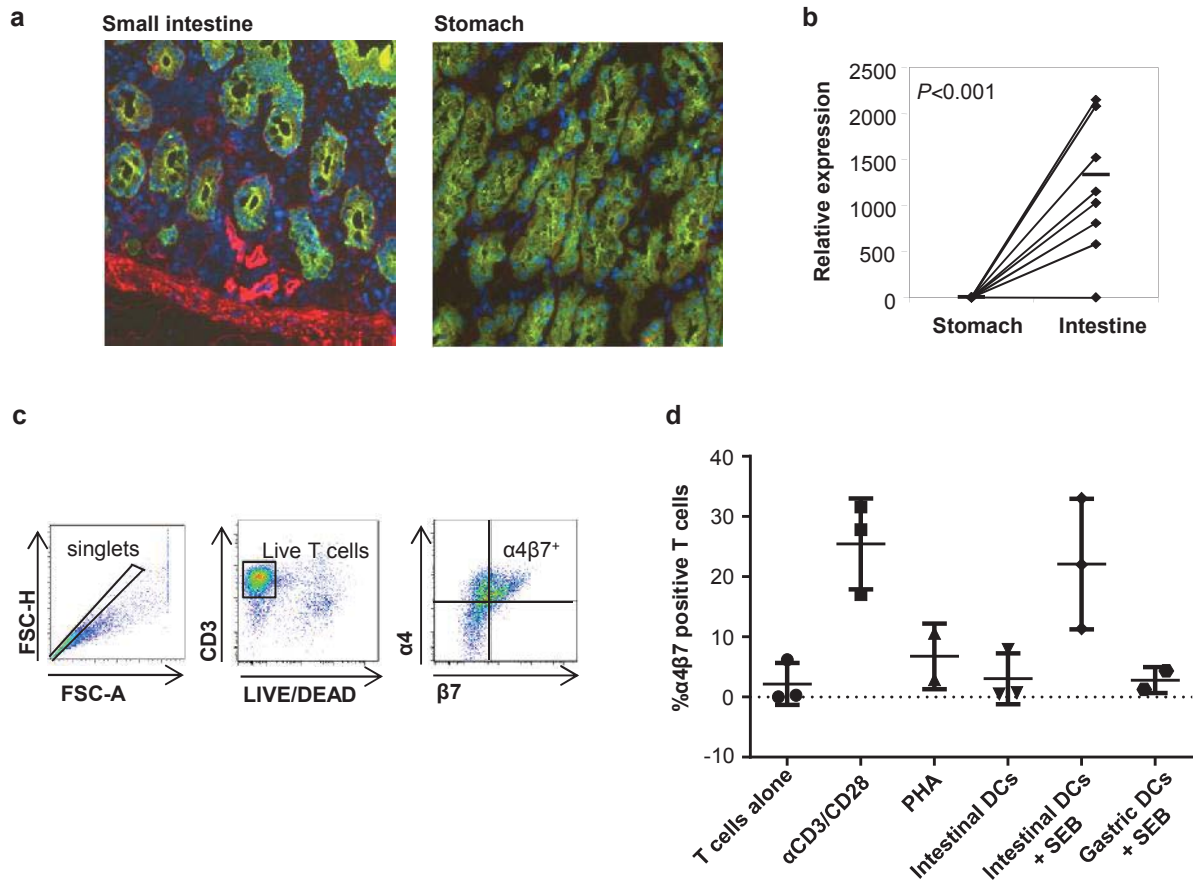

**Supplemental Figure 2: Induction of mucosal homing molecules by gastric and intestinal DCs.** (a) Frozen sections of human small intestinal (left panel) and gastric mucosa (right panel) were labelled with antibodies to epithelial cytokeratin (green) and CCL25 (red). Nuclei were labeled with DAPI (blue);  $n=3$ ; original magnification 20x. (b) Quantitative RT-PCR analysis of human gastric and small intestinal mucosa. Diamonds: individual samples; bars: mean; lines connect donor-matched samples;  $n=8$ . Statistical significance was determined using Student's  $t$ -test. (c,d) Human small intestinal and gastric DCs were purified by FACS as HLA-DR<sup>+++</sup>/CD45<sup>+</sup>/lineage<sup>-</sup> cells, pulsed with SEB (1  $\mu\text{g}/\text{mL}$ ) and then co-cultured with autologous, MACS-purified naïve CD4<sup>+</sup> T cells for 6 days. Combined data from 3 (small intestine) or 2 (stomach) experiments. (c) T cell gating strategy. (d) T cell co-expression of  $\alpha 4$  and  $\beta 7$ . Data points are from untreated T cells, anti-CD3/CD28-treated T cells and T cells co-cultured with untreated intestinal DCs, SEB-pulsed intestinal DCs, and SEB-pulsed gastric DCs.
